# Supplementary material
Source: publisher site journal article supplement (https://www.dovepress.com/get_supplementary_file.php?f=404545.docx)
Supplement: Supplementary file 1 [file get_supplementary_file.php]

Supplementary Table 1

Differential expression miRNAs between healthy controls and serofast status patients. MicroRNAs microarray analysis was performed in 5 healthy controls and 6 serofast status patients. MiRNAs will be considered as differential expression with|log2 foldchange| ≥ 1.0, P < 0.05.

| SystematicName | mirbase_accession_No | pvalues | foldchange |
| --- | --- | --- | --- |
| hsa-miR-1908-3p | MIMAT0026916 | 0.014651 | 0.417928 |

Supplementary Table 2

Differential expression miRNAs between secondary syphilis patients and serofast status patients. MicroRNAs microarray analysis was performed in 5 untreated secondary syphilis patients and 6 serofast status patients. MiRNAs will be considered as differential expression with|log2 foldchange| ≥ 1.0, P < 0.05.

| SystematicName | mirbase_accession_No | pvalues | foldchange |
| --- | --- | --- | --- |
| hsa-miR-4419b | MIMAT0019034 | 9.76E-05 | 0.144294 |
| hsa-miR-3652 | MIMAT0018072 | 0.001896 | 0.216605 |
| hsa-miR-6068 | MIMAT0023693 | 0.001391 | 0.22357 |
| hsa-miR-4745-5p | MIMAT0019878 | 0.010148 | 0.280284 |
| hsa-miR-2861 | MIMAT0013802 | 0.001421 | 0.349832 |
| hsa-miR-1227-5p | MIMAT0022941 | 0.004497 | 0.356289 |
| hsa-miR-6125 | MIMAT0024598 | 0.001015 | 0.363285 |
| hsa-miR-3665 | MIMAT0018087 | 0.009986 | 0.373159 |
| hsa-miR-6089 | MIMAT0023714 | 0.000155 | 0.3734 |
| hsa-miR-4787-3p | MIMAT0019957 | 0.02231 | 0.378038 |
| hsa-miR-940 | MIMAT0004983 | 0.007503 | 0.380709 |
| hsa-miR-3195 | MIMAT0015079 | 0.002145 | 0.387216 |
| hsa-miR-4443 | MIMAT0018961 | 0.045047 | 0.396729 |
| hsa-miR-1260b | MIMAT0015041 | 0.002699 | 0.408826 |
| hsa-miR-638 | MIMAT0003308 | 0.001681 | 0.413188 |
| hsa-miR-6126 | MIMAT0024599 | 0.003735 | 0.414167 |
| hsa-miR-6791-5p | MIMAT0027482 | 0.0031 | 0.415852 |
| hsa-miR-371b-5p | MIMAT0019892 | 0.002394 | 0.426176 |
| hsa-miR-4634 | MIMAT0019691 | 0.010673 | 0.450925 |
| hsa-miR-8071 | MIMAT0030998 | 8.54E-06 | 0.459031 |
| hsa-miR-6858-5p | MIMAT0027616 | 0.000259 | 0.462566 |
| hsa-miR-572 | MIMAT0003237 | 0.002047 | 0.473174 |
| hsa-miR-6789-5p | MIMAT0027478 | 0.030544 | 0.491305 |
| hsa-miR-4687-3p | MIMAT0019775 | 0.011454 | 0.496689 |
| hsa-miR-361-5p | MIMAT0000703 | 0.031098 | 2.065492 |
| hsa-miR-151a-3p | MIMAT0000757 | 0.032383 | 2.076704 |
| hsa-miR-221-3p | MIMAT0000278 | 0.010518 | 2.135318 |
| hsa-miR-93-5p | MIMAT0000093 | 0.043763 | 2.15794 |
| hsa-let-7c-5p | MIMAT0000064 | 0.022581 | 2.228221 |
| hsa-miR-30d-5p | MIMAT0000245 | 0.027545 | 2.249073 |
| hsa-miR-106b-5p | MIMAT0000680 | 0.04862 | 2.330405 |
| hsa-miR-185-5p | MIMAT0000455 | 0.013632 | 2.384111 |
| hsa-miR-4299 | MIMAT0016851 | 0.014471 | 2.430481 |
| hsa-let-7b-5p | MIMAT0000063 | 0.03158 | 2.441827 |
| hsa-miR-1973 | MIMAT0009448 | 0.009633 | 2.520891 |
| hsa-miR-21-5p | MIMAT0000076 | 0.02244 | 2.696151 |
| hsa-let-7i-5p | MIMAT0000415 | 0.016274 | 2.708414 |
| hsa-let-7f-5p | MIMAT0000067 | 0.039241 | 3.002172 |
| hsa-miR-26a-5p | MIMAT0000082 | 0.016956 | 3.240131 |
| hsa-miR-27a-3p | MIMAT0000084 | 0.039815 | 3.276477 |
| hsa-let-7a-5p | MIMAT0000062 | 0.02203 | 4.186861 |
| hsa-miR-4485-5p | MIMAT0032116 | 0.00883 | 5.18712 |
| hsa-miR-494-3p | MIMAT0002816 | 0.008591 | 5.931615 |
| hsa-miR-4485-3p | MIMAT0019019 | 0.021924 | 6.683145 |

Supplementary Table 3

Differential expression miRNAs between serologically cured syphilis patients and serofast status patients. MicroRNAs microarray analysis was performed in 4 serologically cured syphilis patients and 6 serofast status patients. MiRNAs will be considered as differential expression with|log2 foldchange| ≥ 1.0, P < 0.05.

| SystematicName | mirbase_accession_No | pvalues | foldchange |
| --- | --- | --- | --- |
| hsa-miR-1202 | MIMAT0005865 | 0.039591 | 2.049348 |
| hsa-miR-1260a | MIMAT0005911 | 0.017208 | 0.413399 |
| hsa-miR-1273g-3p | MIMAT0022742 | 0.036368 | 0.318855 |
| hsa-miR-197-3p | MIMAT0000227 | 0.005074 | 0.374534 |
| hsa-miR-3198 | MIMAT0015083 | 0.028145 | 2.916653 |
| hsa-miR-3648 | MIMAT0018068 | 0.029636 | 5.534405 |
| hsa-miR-4286 | MIMAT0016916 | 0.000782 | 0.366059 |
| hsa-miR-4419b | MIMAT0019034 | 6.21E-05 | 0.144993 |
| hsa-miR-4459 | MIMAT0018981 | 0.024818 | 2.608121 |
| hsa-miR-4485-5p | MIMAT0032116 | 0.028754 | 0.202354 |
| hsa-miR-4655-3p | MIMAT0019722 | 0.04191 | 0.427842 |

Supplementary Table 4

The top 30 most significantly enriched GO terms associated with target genes of DEmiRNAs between SC and SF. Analysis Method: Fisher Precision Inspection, p < 0.05, q-value < 0.05, diff count ≥ 4

| Description | TYPE | BgRatio | qvalue | Count | enrich_factor |
| --- | --- | --- | --- | --- | --- |
| mitochondrial membrane organization | biological_process | 133/20400 | 0.04682 | 76 | 1.72 |
| GTP binding | molecular_function | 387/20400 | 0.03632 | 182 | 1.42 |
| purine nucleoside binding | molecular_function | 406/20400 | 0.03262 | 190 | 1.41 |
| nucleoside binding | molecular_function | 413/20400 | 0.03689 | 192 | 1.4 |
| ribonucleoside binding | molecular_function | 406/20400 | 0.03789 | 189 | 1.4 |
| mitochondrial envelope | cellular_component | 739/20400 | 0.0008742 | 338 | 1.38 |
| mitochondrial inner membrane | cellular_component | 471/20400 | 0.02966 | 216 | 1.38 |
| mitochondrial membrane | cellular_component | 697/20400 | 0.002363 | 317 | 1.37 |
| mitochondrion organization | biological_process | 525/20400 | 0.02015 | 239 | 1.37 |
| DNA-binding transcription factor activity, RNA polymerase II-specific | molecular_function | 1614/20400 | 0.000000302 | 719 | 1.34 |
| mitochondrion | cellular_component | 1575/20400 | 3.268E-07 | 700 | 1.34 |
| DNA-binding transcription factor activity | molecular_function | 2065/20400 | 3.134E-07 | 888 | 1.3 |
| Golgi membrane | cellular_component | 753/20400 | 0.03596 | 323 | 1.29 |
| regulation of transcription by RNA polymerase II | biological_process | 2680/20400 | 3.827E-07 | 1115 | 1.25 |
| sequence-specific DNA binding | molecular_function | 1136/20400 | 0.01834 | 471 | 1.25 |
| transcription by RNA polymerase II | biological_process | 2818/20400 | 7.464E-07 | 1161 | 1.24 |
| organelle membrane | cellular_component | 3481/20400 | 3.764E-07 | 1421 | 1.23 |
| transcription, DNA-templated | biological_process | 3665/20400 | 0.000000332 | 1483 | 1.22 |
| RNA biosynthetic process | biological_process | 3726/20400 | 3.452E-07 | 1506 | 1.22 |
| regulation of RNA biosynthetic process | biological_process | 3566/20400 | 4.114E-07 | 1442 | 1.22 |
| regulation of nucleic acid-templated transcription | biological_process | 3558/20400 | 4.179E-07 | 1438 | 1.22 |
| regulation of transcription, DNA-templated | biological_process | 3500/20400 | 4.322E-07 | 1418 | 1.22 |
| Golgi apparatus | cellular_component | 1562/20400 | 0.0146 | 630 | 1.22 |
| regulation of RNA metabolic process | biological_process | 3813/20400 | 4.089E-07 | 1531 | 1.21 |
| DNA binding | molecular_function | 2581/20400 | 0.0002882 | 1033 | 1.21 |
| aromatic compound biosynthetic process | biological_process | 4267/20400 | 3.826E-07 | 1704 | 1.2 |
| nucleoplasm | cellular_component | 3512/20400 | 0.000004328 | 1403 | 1.2 |
| positive regulation of transcription, DNA-templated | biological_process | 1515/20400 | 0.03741 | 604 | 1.2 |
| positive regulation of nucleic acid-templated transcription | biological_process | 1600/20400 | 0.03753 | 635 | 1.2 |
| transcription, DNA-templated | biological_process | 3665/20400 | 0.000000332 | 1483 | 1.22 |

Supplementary Table 5

KEGG enrichment analysis of target genes of DEmiRNAs between SC and SF. Analysis Method: Fisher Precision Inspection, p < 0.05, diff count ≥ 4

| Description | BgRatio | pvalue | Count | enrich_factor |
| --- | --- | --- | --- | --- |
| Glycosphingolipid biosynthesis - globo and isoglobo series | 15/7528 | 0.005366 | 12 | 2.32 |
| Mannose type O-glycan biosynthesis | 23/7528 | 0.03216 | 14 | 1.77 |
| Maturity onset diabetes of the young | 26/7528 | 0.04264 | 15 | 1.68 |
| Apoptosis - multiple species | 33/7528 | 0.02588 | 19 | 1.67 |
| Signaling pathways regulating pluripotency of stem cells | 139/7528 | 0.0003962 | 74 | 1.55 |
| Prolactin signaling pathway | 70/7528 | 0.01109 | 37 | 1.54 |
| VEGF signaling pathway | 59/7528 | 0.03337 | 30 | 1.48 |
| Renal cell carcinoma | 69/7528 | 0.0236 | 35 | 1.47 |
| p53 signaling pathway | 72/7528 | 0.04137 | 35 | 1.41 |
| Fc epsilon RI signaling pathway | 68/7528 | 0.04774 | 33 | 1.41 |
| Glioma | 75/7528 | 0.04582 | 36 | 1.39 |
| Neurotrophin signaling pathway | 119/7528 | 0.02157 | 56 | 1.37 |
| ErbB signaling pathway | 85/7528 | 0.04786 | 40 | 1.37 |
| Ribosome | 153/7528 | 0.01001 | 72 | 1.37 |
| HIF-1 signaling pathway | 100/7528 | 0.04945 | 46 | 1.34 |
| Kaposi sarcoma-associated herpesvirus infection | 186/7528 | 0.01122 | 85 | 1.33 |
| Rap1 signaling pathway | 206/7528 | 0.01121 | 93 | 1.31 |
| Ras signaling pathway | 232/7528 | 0.0123 | 103 | 1.29 |
| Hepatitis C | 155/7528 | 0.03503 | 69 | 1.29 |
| Human immunodeficiency virus 1 infection | 212/7528 | 0.02236 | 93 | 1.27 |
